# Supplementary material for: Analysis and correction of compositional bias in sparse sequencing count data
Source: BMC Genomics. 2018 Nov 6;19:799. doi: 10.1186/s12864-018-5160-5 (PMC6219007; doi:10.1186/s12864-018-5160-5)
Supplement: Supplementary file 2 — Enrichment Analysis Results. The results of enrichment analyses based on faprotax annotations and Kegg modules procedure described in the Methods section is presented. Names in the sheets and their descriptions are as follows: KM.POS.SIG.MES and KM.POS.SIG.DCM show the Kegg module based enrichment analyses for positively associated features in MES and DCM layers respectively. FAPRO.POS.SIG.MES and FAPRO.POS.SIG.DCM show the results of faprotax annotations based enrichment analyses for positively associated features in MES and DCM layers respectively. (XLSX 45 kb) [file 12864_2018_5160_MOESM2_ESM.xlsx]

## Sheet: KM.POS.SIG.MES
totsum	tmm	css	scran	wrench.wmmean
ABC-2 type transport system	Acylglycerol degradation	Abscisic acid biosynthesis, beta-carotene => abscisic acid	ArcB-ArcA (anoxic redox control) two-component regulatory system	Acylglycerol degradation
Acylglycerol degradation	alpha-Glucoside transport system	Adenine ribonucleotide biosynthesis, IMP => ADP,ATP	Archaeal proteasome	Adenine ribonucleotide biosynthesis, IMP => ADP,ATP
Adenine ribonucleotide biosynthesis, IMP => ADP,ATP	alpha-Hemolysin/cyclolysin transport system	AI-2 transport system	Arginine/ornithine transport system	AI-2 transport system
alpha-Glucoside transport system	ArcB-ArcA (anoxic redox control) two-component regulatory system	alpha-Glucoside transport system	Bacterial proteasome	alpha-Glucoside transport system
alpha-Hemolysin/cyclolysin transport system	Archaeal proteasome	alpha-Hemolysin/cyclolysin transport system	CreC-CreB (phosphate regulation) two-component regulatory system	ArcB-ArcA (anoxic redox control) two-component regulatory system
ArcB-ArcA (anoxic redox control) two-component regulatory system	Arginine/ornithine transport system	ArcB-ArcA (anoxic redox control) two-component regulatory system	DcuS-DcuR (C4-dicarboxylate metabolism) two-component regulatory system	Archaeal proteasome
Archaeal proteasome	AtoS-AtoC (cPHB biosynthesis) two-component regulatory system	Archaeal proteasome	Denitrification, nitrate => nitrogen	Arginine/ornithine transport system
Arginine/ornithine transport system	Bacterial proteasome	Arginine/ornithine transport system	DesK-DesR (membrane lipid fluidity regulation) two-component regulatory system	Ascorbate biosynthesis, animals, glucose-1P => ascorbate
AtoS-AtoC (cPHB biosynthesis) two-component regulatory system	BaeS-BaeR (envelope stress response) two-component regulatory system	AtoS-AtoC (cPHB biosynthesis) two-component regulatory system	Exosome, archaea	Ascorbate biosynthesis, plants, glucose-6P => ascorbate
Bacterial proteasome	beta-Carotene biosynthesis, GGAP => beta-carotene	Bacterial proteasome	Exosome, eukaryotes	Bacterial proteasome
BaeS-BaeR (envelope stress response) two-component regulatory system	Bloom's syndrome complex	BaeS-BaeR (envelope stress response) two-component regulatory system	F420 biosynthesis	beta-Carotene biosynthesis, GGAP => beta-carotene
beta-Carotene biosynthesis, GGAP => beta-carotene	Cap binding complex	beta-Carotene biosynthesis, GGAP => beta-carotene	FA core complex	C1-unit interconversion, eukaryotes
Bloom's syndrome complex	Capsaicin biosynthesis, L-Phenylalanine => Capsaicin	Bile acid biosynthesis, cholesterol => cholate/chenodeoxycholate	GlrK-GlrR (amino sugar metabolism) two-component regulatory system	C4-dicarboxylic acid cycle, NAD - malic enzyme type
C10-C20 isoprenoid biosynthesis, archaea	Castasterone biosynthesis, campesterol => castasterone	Bloom's syndrome complex	Glucosinolate biosynthesis, tryptophan => glucobrassicin	C4-dicarboxylic acid cycle, NADP - malic enzyme type
Cap binding complex	Catecholamine biosynthesis, tyrosine => dopamine => noradrenaline => adrenaline	C4-dicarboxylic acid cycle, NADP - malic enzyme type	H/ACA ribonucleoprotein complex	C5 isoprenoid biosynthesis, non-mevalonate pathway
Capsaicin biosynthesis, L-Phenylalanine => Capsaicin	CitA-CitB (citrate fermentation) two-component regulatory system	Cap binding complex	LiaS-LiaR (cell wall stress response) two-component regulatory system	CAM (Crassulacean acid metabolism), dark
Castasterone biosynthesis, campesterol => castasterone	Cobalt/nickel transport system	Castasterone biosynthesis, campesterol => castasterone	Lysine biosynthesis, mediated by LysW, 2-aminoadipate => lysine	CAM (Crassulacean acid metabolism), light
Catecholamine biosynthesis, tyrosine => dopamine => noradrenaline => adrenaline	ComD-ComE (competence) two-component regulatory system	ChvG-ChvI (acidity sensing) two-component regulatory system	Methanogenesis, methanol => methane	Castasterone biosynthesis, campesterol => castasterone
Cobalt/nickel transport system	COPII complex	Cobalt/nickel transport system	NA	ChvG-ChvI (acidity sensing) two-component regulatory system
ComD-ComE (competence) two-component regulatory system	CreC-CreB (phosphate regulation) two-component regulatory system	COPII complex	NA	Cobalt/nickel transport system
COPII complex	Cul3-SPOP complex	Creatine pathway	Nitrification, ammonia => nitrite	Coenzyme A biosynthesis, pantothenate => CoA
Creatine pathway	Cul4-DDB1-CSA complex	CreC-CreB (phosphate regulation) two-component regulatory system	p97-Ufd1-Npl4 complex	Creatine pathway
CreC-CreB (phosphate regulation) two-component regulatory system	Cul4-DDB1-DDB2 complex	Cul3-SPOP complex	PrrB-PrrA (intracellular multiplication) two-component regulatory system	CreC-CreB (phosphate regulation) two-component regulatory system
Cul3-SPOP complex	Cysteine biosynthesis, serine => cysteine	Cysteine biosynthesis, serine => cysteine	PTS system, beta-glucoside-specific II component	Cysteine biosynthesis, serine => cysteine
Cul4-DDB1-CSA complex	Cytochrome b6f complex	Cytochrome b6f complex	Putative ABC transport system	Cytochrome d ubiquinol oxidase
Cul4-DDB1-DDB2 complex	Cytochrome c oxidase	Cytochrome bc1 complex	RNA polymerase, archaea	DcuS-DcuR (C4-dicarboxylate metabolism) two-component regulatory system
Cysteine biosynthesis, serine => cysteine	DcuS-DcuR (C4-dicarboxylate metabolism) two-component regulatory system	Cytochrome c oxidase	RPA complex	Denitrification, nitrate => nitrogen
Cytochrome b6f complex	Decapping complex	DcuS-DcuR (C4-dicarboxylate metabolism) two-component regulatory system	Toluene degradation, anaerobic, toluene => benzoyl-CoA	DesK-DesR (membrane lipid fluidity regulation) two-component regulatory system
Cytochrome c oxidase	Denitrification, nitrate => nitrogen	Decapping complex	V/A-type ATPase, prokaryotes	DNA polymerase III complex, bacteria
Cytochrome d ubiquinol oxidase	DesK-DesR (membrane lipid fluidity regulation) two-component regulatory system	Denitrification, nitrate => nitrogen	Vitamin B12 transport system	EnvZ-OmpR (osmotic stress response) two-component regulatory system
DcuS-DcuR (C4-dicarboxylate metabolism) two-component regulatory system	DNA polymerase alpha / primase complex	DesK-DesR (membrane lipid fluidity regulation) two-component regulatory system		Ethylene biosynthesis, methionine => ethylene
Decapping complex	DNA polymerase epsilon complex	DNA polymerase alpha / primase complex		Exosome, archaea
Denitrification, nitrate => nitrogen	DNA-PK complex	DNA polymerase epsilon complex		Exosome, eukaryotes
DesK-DesR (membrane lipid fluidity regulation) two-component regulatory system	ECV complex	DNA polymerase III complex, bacteria		F420 biosynthesis
Dissimilatory nitrate reduction, nitrate => ammonia	ESCRT-I complex	ECV complex		Formaldehyde assimilation, serine pathway
DNA polymerase alpha / primase complex	ESCRT-III complex	EnvZ-OmpR (osmotic stress response) two-component regulatory system		General L-amino acid transport system
DNA polymerase epsilon complex	Exon junction complex (EJC)	ESCRT-I complex		GlrK-GlrR (amino sugar metabolism) two-component regulatory system
DNA-PK complex	Exosome, archaea	ESCRT-III complex		Gluconeogenesis, oxaloacetate => fructose-6P
ECV complex	Exosome, eukaryotes	Exosome, archaea		Glucosinolate biosynthesis, tryptophan => glucobrassicin
ESCRT-I complex	F-type ATPase, eukaryotes	Exosome, eukaryotes		Glucuronate pathway (uronate pathway)
ESCRT-III complex	F420 biosynthesis	F-type ATPase, eukaryotes		Glycolysis, core module involving three-carbon compounds
Exosome, archaea	FA core complex	F-type ATPase, prokaryotes and chloroplasts		Guanine ribonucleotide biosynthesis IMP => GDP,GTP
Exosome, eukaryotes	Fatty acid biosynthesis, elongation, endoplasmic reticulum	F420 biosynthesis		Histidine biosynthesis, PRPP => histidine
F-type ATPase, eukaryotes	Fructose transport system	FA core complex		Inosine monophosphate biosynthesis, PRPP + glutamine => IMP
F420 biosynthesis	Fumarate reductase, prokaryotes	Fatty acid biosynthesis, elongation, endoplasmic reticulum		Inositol phosphate metabolism, Ins(1,3,4,5)P4 => Ins(1,3,4)P3 => myo-inositol
FA core complex	GINS complex	Fatty acid biosynthesis, initiation		Iron(III) transport system
Fatty acid biosynthesis, elongation, endoplasmic reticulum	GlrK-GlrR (amino sugar metabolism) two-component regulatory system	Fructose transport system		L-Arabinose/lactose transport system
Fructose transport system	Glucosinolate biosynthesis, tryptophan => glucobrassicin	General L-amino acid transport system		Leucine biosynthesis, 2-oxoisovalerate => 2-oxoisocaproate
Fumarate reductase, prokaryotes	Glucuronate pathway (uronate pathway)	GINS complex		Lysine biosynthesis, acetyl-DAP pathway, aspartate => lysine
GINS complex	Glutathione biosynthesis, glutamate => glutathione	GlrK-GlrR (amino sugar metabolism) two-component regulatory system		Lysine biosynthesis, DAP aminotransferase pathway, aspartate => lysine
GlrK-GlrR (amino sugar metabolism) two-component regulatory system	H/ACA ribonucleoprotein complex	Glucuronate pathway (uronate pathway)		Lysine biosynthesis, mediated by LysW, 2-aminoadipate => lysine
Glucosinolate biosynthesis, tryptophan => glucobrassicin	HRD1/SEL1 ERAD complex	Glutathione biosynthesis, glutamate => glutathione		Lysine biosynthesis, succinyl-DAP pathway, aspartate => lysine
Glucuronate pathway (uronate pathway)	HydH-HydG (metal tolerance) two-component regulatory system	Guanine ribonucleotide biosynthesis IMP => GDP,GTP		Maltose/maltodextrin transport system
Glutathione biosynthesis, glutamate => glutathione	Immunoproteasome	H/ACA ribonucleoprotein complex		Manganese/iron transport system
H/ACA ribonucleoprotein complex	Inositol phosphate metabolism, Ins(1,3,4)P3 => phytate	HRD1/SEL1 ERAD complex		Menaquinone biosynthesis, chorismate => menaquinone
HRD1/SEL1 ERAD complex	Inositol phosphate metabolism, PI=> PIP2 => Ins(1,4,5)P3 => Ins(1,3,4,5)P4	HydH-HydG (metal tolerance) two-component regulatory system		Methanogenesis, methanol => methane
HydH-HydG (metal tolerance) two-component regulatory system	KinB-AlgB (alginate production) two-component regulatory system	Immunoproteasome		Methionine degradation
Immunoproteasome	L-Arabinose/lactose transport system	Iron(III) transport system		Methionine salvage pathway
Inositol phosphate metabolism, Ins(1,3,4)P3 => phytate	LiaS-LiaR (cell wall stress response) two-component regulatory system	KinB-AlgB (alginate production) two-component regulatory system		Monolignol biosynthesis, phenylalanine/tyrosine => monolignol
Inositol phosphate metabolism, PI=> PIP2 => Ins(1,4,5)P3 => Ins(1,3,4,5)P4	Lipooligosaccharide transport system	L-Arabinose/lactose transport system		NA
Jasmonic acid biosynthesis	Lsm 1-7 complex	LiaS-LiaR (cell wall stress response) two-component regulatory system		NA
L-Arabinose/lactose transport system	Lsm 2-8 complex	Lipooligosaccharide transport system		NA
LiaS-LiaR (cell wall stress response) two-component regulatory system	Lysine biosynthesis, 2-oxoglutarate => 2-oxoadipate	Lipopolysaccharide export system		NAD biosynthesis, aspartate => NAD
Lipooligosaccharide transport system	Lysine biosynthesis, mediated by LysW, 2-aminoadipate => lysine	Lsm 1-7 complex		NAD(P)H:quinone oxidoreductase, chloroplasts and cyanobacteria
Lipopolysaccharide transport system	Manganese/iron transport system	Lsm 2-8 complex		NblS-NblR (photosynthesis) two-component regulatory system
Lsm 1-7 complex	Manganese/iron transport system	Lysine biosynthesis, 2-oxoglutarate => 2-oxoadipate		Nickel transport system
Lsm 2-8 complex	MCM complex	Lysine biosynthesis, mediated by LysW, 2-aminoadipate => lysine		Nitrification, ammonia => nitrite
Lysine biosynthesis, 2-oxoglutarate => 2-oxoadipate	Melatonin biosynthesis, tryptophan => serotonin => melatonin	Lysine biosynthesis, succinyl-DAP pathway, aspartate => lysine		NtrY-NtrX (nitrogen regulation) two-component regulatory system
Lysine biosynthesis, mediated by LysW, 2-aminoadipate => lysine	Methanogenesis, methanol => methane	Manganese/iron transport system		Nucleotide sugar biosynthesis, eukaryotes
Manganese/iron transport system	MRN complex	Manganese/iron transport system		Nucleotide sugar biosynthesis, prokaryotes
Manganese/iron transport system	MRX complex	MCM complex		Octopine/nopaline transport system
MCM complex	N-glycan biosynthesis, high-mannose type	Methanogenesis, methanol => methane		Pantothenate biosynthesis, valine/L-aspartate => pantothenate
Melatonin biosynthesis, tryptophan => serotonin => melatonin	N-glycan precursor biosynthesis	N-glycan biosynthesis, high-mannose type		Pentose phosphate pathway (Pentose phosphate cycle)
Methanogenesis, acetate => methane	N-glycan precursor trimming	N-glycan precursor biosynthesis		Pentose phosphate pathway, non-oxidative phase, fructose 6P => ribose 5P
Methanogenesis, methanol => methane	N-glycosylation by oligosaccharyltransferase	N-glycan precursor trimming		Pentose phosphate pathway, oxidative phase, glucose 6P => ribulose 5P
Molybdate transport system	NA	N-glycosylation by oligosaccharyltransferase		Phenylalanine biosynthesis, chorismate => phenylalanine
MRN complex	NA	NA		Phospholipid transport system
MRX complex	NA	NA		Photosystem II
N-glycan biosynthesis, high-mannose type	NAD(P)H:quinone oxidoreductase, chloroplasts and cyanobacteria	NA		Polyamine biosynthesis, arginine => agmatine => putrescine => spermidine
N-glycan precursor biosynthesis	NADH dehydrogenase (ubiquinone) 1 beta subcomplex	NA		Proline biosynthesis, glutamate => proline
N-glycan precursor trimming	NADH dehydrogenase (ubiquinone) Fe-S protein/flavoprotein complex, mitochondria	NAD biosynthesis, aspartate => NAD		PrrB-PrrA (intracellular multiplication) two-component regulatory system
N-glycosylation by oligosaccharyltransferase	NADH:ubiquinone oxidoreductase, mitochondria	NAD(P)H:quinone oxidoreductase, chloroplasts and cyanobacteria		PTS system, beta-glucoside-specific II component
NA	NblS-NblR (photosynthesis) two-component regulatory system	NblS-NblR (photosynthesis) two-component regulatory system		PTS system, mannitol-specific II component
NA	Nickel transport system	Nickel transport system		Putative fructooligosaccharide transport system
NA	Nitrification, ammonia => nitrite	Nitrification, ammonia => nitrite		Putative zinc/manganese transport system
NA	Nuclear pore complex	NtrY-NtrX (nitrogen regulation) two-component regulatory system		Pyrimidine deoxyribonuleotide biosynthesis, CDP/CTP => dCDP/dCTP,dTDP/dTTP
NAD biosynthesis, aspartate => NAD	O-glycan biosynthesis, mucin type core	Nuclear pore complex		Pyrimidine ribonucleotide biosynthesis, UMP => UDP/UTP,CDP/CTP
NAD(P)H:quinone oxidoreductase, chloroplasts and cyanobacteria	Origin recognition complex	O-glycan biosynthesis, mucin type core		Reductive pentose phosphate cycle (Calvin cycle)
NADH dehydrogenase (ubiquinone) 1 beta subcomplex	Osmoprotectant transport system	Octopine/nopaline transport system		Reductive pentose phosphate cycle, glyceraldehyde-3P => ribulose-5P
NADH dehydrogenase (ubiquinone) Fe-S protein/flavoprotein complex, mitochondria	p97-Ufd1-Npl4 complex	Origin recognition complex		Reductive pentose phosphate cycle, ribulose-5P => glyceraldehyde-3P
NblS-NblR (photosynthesis) two-component regulatory system	Phosphate transport system	Osmoprotectant transport system		RegB-RegA (redox response) two-component regulatory system
Nickel transport system	Phospholipid transport system	p97-Ufd1-Npl4 complex		Riboflavin biosynthesis, GTP => riboflavin/FMN/FAD
Nitrification, ammonia => nitrite	Photosystem I	Pentose phosphate pathway, oxidative phase, glucose 6P => ribulose 5P		RNA degradosome
Nuclear pore complex	Photosystem II	Phenylalanine biosynthesis, chorismate => phenylalanine		RNA polymerase, archaea
O-glycan biosynthesis, mucin type core	Proteasome, 19S regulatory particle (PA700)	Phosphate transport system		RNA polymerase, bacteria
Origin recognition complex	Proteasome, 20S core particle	Phospholipid transport system		RPA complex
Osmoprotectant transport system	PrrB-PrrA (intracellular multiplication) two-component regulatory system	Photosystem I		Shikimate pathway, phosphoenolpyruvate + erythrose-4P => chorismate
p97-Ufd1-Npl4 complex	PTS system, beta-glucoside-specific II component	Photosystem II		Tetrahydrofolate biosynthesis, GTP => THF
Pentose phosphate pathway (Pentose phosphate cycle)	PTS system, glucitol/sorbitol-specific II component	Polyamine biosynthesis, arginine => ornithine => putrescine		Toluene degradation, anaerobic, toluene => benzoyl-CoA
Peptides/nickel transport system	PTS system, mannitol-specific II component	Proline biosynthesis, glutamate => proline		Triacylglycerol biosynthesis
Phenylalanine biosynthesis, chorismate => phenylalanine	Putative ABC transport system	Proteasome, 19S regulatory particle (PA700)		Tyrosine biosynthesis, prephanate => pretyrosine => tyrosine
Phosphate transport system	Putative glutamine transport system	Proteasome, 20S core particle		Uridine monophosphate biosynthesis, glutamine (+ PRPP) => UMP
Phospholipid transport system	Putative zinc/manganese transport system	PrrB-PrrA (intracellular multiplication) two-component regulatory system		V/A-type ATPase, prokaryotes
Photosystem I	Rhamnose transport system	PTS system, beta-glucoside-specific II component		Valine/isoleucine biosynthesis, pyruvate => valine / 2-oxobutanoate => isoleucine
Photosystem II	Ribosome, eukaryotes	PTS system, glucitol/sorbitol-specific II component		Vitamin B12 transport system
Proteasome, 19S regulatory particle (PA700)	RNA polymerase, archaea	PTS system, mannitol-specific II component		YdfH-YdfI two-component regulatory system
Proteasome, 20S core particle	RPA complex	Putative ABC transport system		Zinc transport system
PrrB-PrrA (intracellular multiplication) two-component regulatory system	RTX toxin transport system	Putative sn-glycerol-phosphate transport system
PTS system, beta-glucoside-specific II component	SasA-RpaAB (circadian timing mediating) two-component regulatory system	Putative zinc/manganese transport system
PTS system, glucitol/sorbitol-specific II component	SCF-BTRC complex	Pyridoxal biosynthesis, erythrose-4P => pyridoxal-5P
PTS system, mannitol-specific II component	SCF-CDC4 complex	Pyrimidine deoxyribonuleotide biosynthesis, CDP/CTP => dCDP/dCTP,dTDP/dTTP
Putative ABC transport system	SCF-FBS complex	RegB-RegA (redox response) two-component regulatory system
Putative glutamine transport system	SCF-FBW7 complex	Rhamnose transport system
Putative zinc/manganese transport system	SCF-GRR1 complex	Riboflavin biosynthesis, GTP => riboflavin/FMN/FAD
Pyrimidine deoxyribonuleotide biosynthesis, CDP/CTP => dCDP/dCTP,dTDP/dTTP	SCF-MET30 complex	Ribosome, eukaryotes
Rhamnose transport system	SCF-SKP2 complex	RNA degradosome
Riboflavin biosynthesis, GTP => riboflavin/FMN/FAD	Sec61 complex	RNA polymerase, archaea
Ribosome, eukaryotes	Ski complex	RNA polymerase, bacteria
RNA polymerase, archaea	Sm core complex	RPA complex
RNA polymerase, bacteria	Sphingosine degradation	RTX toxin transport system
RPA complex	Spliceosome, 35S U5-snRNP	SasA-RpaAB (circadian timing mediating) two-component regulatory system
RTX toxin transport system	Spliceosome, U1-snRNP	SCF-BTRC complex
SasA-RpaAB (circadian timing mediating) two-component regulatory system	Spliceosome, U2-snRNP	SCF-CDC4 complex
SCF-BTRC complex	Spliceosome, U4/U6.U5 tri-snRNP	SCF-FBS complex
SCF-CDC4 complex	Survival motor neuron (SMN) complex	SCF-FBW7 complex
SCF-FBS complex	THC complex	SCF-GRR1 complex
SCF-FBW7 complex	Toluene degradation, anaerobic, toluene => benzoyl-CoA	SCF-MET30 complex
SCF-GRR1 complex	Trehalose/maltose transport system	SCF-SKP2 complex
SCF-MET30 complex	TREX complex	Sec61 complex
SCF-SKP2 complex	Tyrosine biosynthesis, prephanate => pretyrosine => tyrosine	Sm core complex
Sec61 complex	Ubiquinone biosynthesis, eukaryotes, 4-hydroxybenzoate => ubiquinone	Spliceosome, 35S U5-snRNP
Ski complex	Urea transport system	Spliceosome, U1-snRNP
Sm core complex	V-type ATPase, eukaryotes	Spliceosome, U2-snRNP
Spermidine/putrescine transport system	V/A-type ATPase, prokaryotes	Spliceosome, U4/U6.U5 tri-snRNP
Sphingosine degradation	Vitamin B12 transport system	THC complex
Spliceosome, 35S U5-snRNP	YdfH-YdfI two-component regulatory system	Toluene degradation, anaerobic, toluene => benzoyl-CoA
Spliceosome, U1-snRNP		Trehalose/maltose transport system
Spliceosome, U2-snRNP		TREX complex
Spliceosome, U4/U6.U5 tri-snRNP		Tyrosine biosynthesis, prephanate => pretyrosine => tyrosine
Survival motor neuron (SMN) complex		Ubiquinone biosynthesis, eukaryotes, 4-hydroxybenzoate => ubiquinone
THC complex		Urea transport system
Toluene degradation, anaerobic, toluene => benzoyl-CoA		V-type ATPase, eukaryotes
Trehalose/maltose transport system		V/A-type ATPase, prokaryotes
TREX complex		Vitamin B12 transport system
Tryptophan metabolism, tryptophan => kynurenine => 2-aminomuconate		YdfH-YdfI two-component regulatory system
Tyrosine biosynthesis, prephanate => pretyrosine => tyrosine		Zinc transport system
Ubiquinone biosynthesis, eukaryotes, 4-hydroxybenzoate => ubiquinone
Urea transport system
V-type ATPase, eukaryotes
V/A-type ATPase, prokaryotes
Vitamin B12 transport system
YdfH-YdfI two-component regulatory system

## Sheet: FAPRO.POS.SIG.MES
totsum	tmm	css	scran	wrench.wmmean
aerobic_ammonia_oxidation	aerobic_ammonia_oxidation	aerobic_ammonia_oxidation	aerobic_ammonia_oxidation	aerobic_ammonia_oxidation
aerobic_anoxygenic_phototrophy	aerobic_anoxygenic_phototrophy	aerobic_anoxygenic_phototrophy	aerobic_anoxygenic_phototrophy	aerobic_anoxygenic_phototrophy
aerobic_chemoheterotrophy	aerobic_chemoheterotrophy	aerobic_chemoheterotrophy	aerobic_chemoheterotrophy	aerobic_chemoheterotrophy
aerobic_nitrite_oxidation	aerobic_nitrite_oxidation	aerobic_nitrite_oxidation	aerobic_nitrite_oxidation	aerobic_nitrite_oxidation
aliphatic_non_methane_hydrocarbon_degradation	aliphatic_non_methane_hydrocarbon_degradation	aliphatic_non_methane_hydrocarbon_degradation	aliphatic_non_methane_hydrocarbon_degradation	aliphatic_non_methane_hydrocarbon_degradation
animal_parasites_or_symbionts	animal_parasites_or_symbionts	animal_parasites_or_symbionts	anammox	anammox
aromatic_compound_degradation	aromatic_compound_degradation	aromatic_compound_degradation	animal_parasites_or_symbionts	animal_parasites_or_symbionts
aromatic_hydrocarbon_degradation	aromatic_hydrocarbon_degradation	aromatic_hydrocarbon_degradation	anoxygenic_photoautotrophy	anoxygenic_photoautotrophy
arsenate_detoxification	arsenate_detoxification	arsenate_detoxification	anoxygenic_photoautotrophy_Fe_oxidizing	anoxygenic_photoautotrophy_Fe_oxidizing
arsenate_respiration	arsenate_respiration	arsenate_respiration	anoxygenic_photoautotrophy_H2_oxidizing	anoxygenic_photoautotrophy_H2_oxidizing
arsenite_oxidation_detoxification	arsenite_oxidation_detoxification	arsenite_oxidation_detoxification	anoxygenic_photoautotrophy_S_oxidizing	anoxygenic_photoautotrophy_S_oxidizing
chitinolysis	chitinolysis	chitinolysis	aromatic_compound_degradation	aromatic_compound_degradation
dark_iron_oxidation	dark_iron_oxidation	dark_iron_oxidation	aromatic_hydrocarbon_degradation	aromatic_hydrocarbon_degradation
dark_sulfite_oxidation	dark_sulfite_oxidation	dark_sulfite_oxidation	arsenate_detoxification	arsenate_detoxification
dark_thiosulfate_oxidation	dark_thiosulfate_oxidation	dark_thiosulfate_oxidation	arsenate_respiration	arsenate_respiration
denitrification	denitrification	denitrification	arsenite_oxidation_detoxification	arsenite_oxidation_detoxification
fish_parasites	fish_parasites	fish_parasites	arsenite_oxidation_energy_yielding	arsenite_oxidation_energy_yielding
fumarate_respiration	fumarate_respiration	fumarate_respiration	cellulolysis	cellulolysis
human_gut	human_gut	human_gut	chitinolysis	chitinolysis
human_pathogens_all	human_pathogens_all	human_pathogens_all	dark_iron_oxidation	dark_iron_oxidation
human_pathogens_diarrhea	human_pathogens_diarrhea	human_pathogens_diarrhea	dark_sulfide_oxidation	dark_sulfide_oxidation
human_pathogens_gastroenteritis	human_pathogens_gastroenteritis	human_pathogens_gastroenteritis	dark_sulfur_oxidation	dark_sulfur_oxidation
human_pathogens_meningitis	human_pathogens_meningitis	human_pathogens_meningitis	dark_thiosulfate_oxidation	dark_thiosulfate_oxidation
human_pathogens_nosocomia	human_pathogens_nosocomia	human_pathogens_nosocomia	dissimilatory_arsenite_oxidation	fish_parasites
human_pathogens_pneumonia	human_pathogens_pneumonia	human_pathogens_pneumonia	fish_parasites	fumarate_respiration
human_pathogens_septicemia	human_pathogens_septicemia	human_pathogens_septicemia	fumarate_respiration	human_gut
hydrocarbon_degradation	hydrocarbon_degradation	hydrocarbon_degradation	human_gut	human_pathogens_all
invertebrate_parasites	invertebrate_parasites	invertebrate_parasites	human_pathogens_all	human_pathogens_diarrhea
iron_respiration	iron_respiration	iron_respiration	human_pathogens_diarrhea	human_pathogens_gastroenteritis
ligninolysis	ligninolysis	ligninolysis	human_pathogens_gastroenteritis	human_pathogens_meningitis
manganese_oxidation	manganese_oxidation	manganese_oxidation	human_pathogens_meningitis	human_pathogens_nosocomia
manganese_respiration	manganese_respiration	manganese_respiration	human_pathogens_nosocomia	human_pathogens_pneumonia
methanogenesis_by_CO2_reduction_with_H2	methanogenesis_by_CO2_reduction_with_H2	methanogenesis_by_CO2_reduction_with_H2	human_pathogens_pneumonia	human_pathogens_septicemia
methanogenesis_by_reduction_of_methyl_compounds_with_H2	methanol_oxidation	methanol_oxidation	human_pathogens_septicemia	hydrocarbon_degradation
methanol_oxidation	methanotrophy	methanotrophy	hydrocarbon_degradation	invertebrate_parasites
methanotrophy	methylotrophy	methylotrophy	intracellular_parasites	invertebrate_parasites
methylotrophy	nitrate_ammonification	nitrate_ammonification	invertebrate_parasites	iron_respiration
nitrate_ammonification	nitrate_denitrification	nitrate_denitrification	invertebrate_parasites	ligninolysis
nitrate_denitrification	nitrate_reduction	nitrate_reduction	iron_respiration	manganese_oxidation
nitrate_reduction	nitrate_respiration	nitrate_respiration	ligninolysis	manganese_respiration
nitrate_respiration	nitrite_denitrification	nitrite_ammonification	manganese_oxidation	methanogenesis_by_CO2_reduction_with_H2
nitrite_denitrification	nitrogen_fixation	nitrite_denitrification	manganese_respiration	methanogenesis_by_reduction_of_methyl_compounds_with_H2
nitrogen_fixation	nitrous_oxide_denitrification	nitrogen_fixation	methanogenesis_by_CO2_reduction_with_H2	methanol_oxidation
nitrous_oxide_denitrification	oil_bioremediation	nitrous_oxide_denitrification	methanogenesis_by_reduction_of_methyl_compounds_with_H2	methanotrophy
oil_bioremediation	photoheterotrophy	oil_bioremediation	methanol_oxidation	methylotrophy
photoheterotrophy	plastic_degradation	photoheterotrophy	methanotrophy	nitrate_ammonification
plastic_degradation	predatory_or_exoparasitic	predatory_or_exoparasitic	methylotrophy	nitrate_denitrification
predatory_or_exoparasitic	reductive_acetogenesis	reductive_acetogenesis	nitrate_ammonification	nitrate_reduction
reductive_acetogenesis	sulfite_respiration	sulfite_respiration	nitrate_denitrification	nitrate_respiration
sulfite_respiration	sulfur_respiration	sulfur_respiration	nitrate_reduction	nitrite_ammonification
sulfur_respiration	thiosulfate_respiration	thiosulfate_respiration	nitrate_respiration	nitrite_denitrification
thiosulfate_respiration	ureolysis	ureolysis	nitrite_ammonification	nitrite_respiration
ureolysis	xylanolysis	xylanolysis	nitrite_denitrification	nitrogen_fixation
xylanolysis			nitrite_respiration	nitrous_oxide_denitrification
			nitrogen_fixation	oil_bioremediation
			nitrous_oxide_denitrification	photoheterotrophy
			oil_bioremediation	plant_pathogen
			photoheterotrophy	predatory_or_exoparasitic
			plant_pathogen	reductive_acetogenesis
			predatory_or_exoparasitic	sulfur_respiration
			reductive_acetogenesis	ureolysis
			sulfur_respiration
			thiosulfate_respiration
			ureolysis

## Sheet: KM.POS.SIG.DCM
totsum	tmm	css	scran	wrench.wmmean
ABC-2 type transport system	Acylglycerol degradation	Abscisic acid biosynthesis, beta-carotene => abscisic acid	ArcB-ArcA (anoxic redox control) two-component regulatory system	ArcB-ArcA (anoxic redox control) two-component regulatory system
Acylglycerol degradation	alpha-Glucoside transport system	Adenine ribonucleotide biosynthesis, IMP => ADP,ATP	Archaeal proteasome	Archaeal proteasome
Adenine ribonucleotide biosynthesis, IMP => ADP,ATP	alpha-Hemolysin/cyclolysin transport system	AI-2 transport system	Arginine/ornithine transport system	Arginine/ornithine transport system
alpha-Glucoside transport system	ArcB-ArcA (anoxic redox control) two-component regulatory system	alpha-Glucoside transport system	Bacterial proteasome	Bacterial proteasome
alpha-Hemolysin/cyclolysin transport system	Archaeal proteasome	alpha-Hemolysin/cyclolysin transport system	DcuS-DcuR (C4-dicarboxylate metabolism) two-component regulatory system	Cytochrome d ubiquinol oxidase
ArcB-ArcA (anoxic redox control) two-component regulatory system	Arginine/ornithine transport system	ArcB-ArcA (anoxic redox control) two-component regulatory system	Denitrification, nitrate => nitrogen	DcuS-DcuR (C4-dicarboxylate metabolism) two-component regulatory system
Archaeal proteasome	AtoS-AtoC (cPHB biosynthesis) two-component regulatory system	Archaeal proteasome	DesK-DesR (membrane lipid fluidity regulation) two-component regulatory system	Denitrification, nitrate => nitrogen
Arginine/ornithine transport system	Bacterial proteasome	Arginine/ornithine transport system	DNA polymerase II complex, archaea	DesK-DesR (membrane lipid fluidity regulation) two-component regulatory system
AtoS-AtoC (cPHB biosynthesis) two-component regulatory system	BaeS-BaeR (envelope stress response) two-component regulatory system	AtoS-AtoC (cPHB biosynthesis) two-component regulatory system	Exosome, archaea	DNA polymerase II complex, archaea
Bacterial proteasome	beta-Carotene biosynthesis, GGAP => beta-carotene	Bacterial proteasome	Exosome, eukaryotes	Exosome, archaea
BaeS-BaeR (envelope stress response) two-component regulatory system	Bloom's syndrome complex	BaeS-BaeR (envelope stress response) two-component regulatory system	F420 biosynthesis	FA core complex
beta-Carotene biosynthesis, GGAP => beta-carotene	Cap binding complex	beta-Carotene biosynthesis, GGAP => beta-carotene	FA core complex	GlrK-GlrR (amino sugar metabolism) two-component regulatory system
Bloom's syndrome complex	Capsaicin biosynthesis, L-Phenylalanine => Capsaicin	Bile acid biosynthesis, cholesterol => cholate/chenodeoxycholate	GlrK-GlrR (amino sugar metabolism) two-component regulatory system	Glucuronate pathway (uronate pathway)
Cap binding complex	Castasterone biosynthesis, campesterol => castasterone	Bloom's syndrome complex	Glucosinolate biosynthesis, tryptophan => glucobrassicin	Glutamine transport system
Capsaicin biosynthesis, L-Phenylalanine => Capsaicin	Catecholamine biosynthesis, tyrosine => dopamine => noradrenaline => adrenaline	Cap binding complex	H/ACA ribonucleoprotein complex	H/ACA ribonucleoprotein complex
Castasterone biosynthesis, campesterol => castasterone	Cobalt/nickel transport system	Castasterone biosynthesis, campesterol => castasterone	Lysine biosynthesis, mediated by LysW, 2-aminoadipate => lysine	HRD1/SEL1 ERAD complex
Catecholamine biosynthesis, tyrosine => dopamine => noradrenaline => adrenaline	ComD-ComE (competence) two-component regulatory system	ChvG-ChvI (acidity sensing) two-component regulatory system	Methanogenesis, methanol => methane	Lysine biosynthesis, mediated by LysW, 2-aminoadipate => lysine
Cobalt/nickel transport system	COPII complex	Cobalt/nickel transport system	NA	Methanogenesis, methanol => methane
ComD-ComE (competence) two-component regulatory system	CreC-CreB (phosphate regulation) two-component regulatory system	ComD-ComE (competence) two-component regulatory system	NA	MprB-MprA (maintenance of persistent infection) two-component regulatory system
COPII complex	Cul3-SPOP complex	COPII complex	Nitrification, ammonia => nitrite	NA
CreC-CreB (phosphate regulation) two-component regulatory system	Cul4-DDB1-CSA complex	Creatine pathway	Osmoprotectant transport system	NA
Cul3-SPOP complex	Cul4-DDB1-DDB2 complex	Cul3-SPOP complex	p97-Ufd1-Npl4 complex	NA
Cul4-DDB1-CSA complex	Cytochrome b6f complex	Cysteine biosynthesis, serine => cysteine	PrrB-PrrA (intracellular multiplication) two-component regulatory system	Nitrification, ammonia => nitrite
Cul4-DDB1-DDB2 complex	Cytochrome c oxidase	Cytochrome b6f complex	PTS system, beta-glucoside-specific II component	Osmoprotectant transport system
Cysteine biosynthesis, serine => cysteine	DcuS-DcuR (C4-dicarboxylate metabolism) two-component regulatory system	Cytochrome bc1 complex	Putative ABC transport system	p97-Ufd1-Npl4 complex
Cytochrome b6f complex	Decapping complex	Cytochrome c oxidase	RNA polymerase, archaea	PrrB-PrrA (intracellular multiplication) two-component regulatory system
Cytochrome c oxidase	Denitrification, nitrate => nitrogen	DcuS-DcuR (C4-dicarboxylate metabolism) two-component regulatory system	RPA complex	PTS system, beta-glucoside-specific II component
Cytochrome d ubiquinol oxidase	DesK-DesR (membrane lipid fluidity regulation) two-component regulatory system	Denitrification, nitrate => nitrogen	Toluene degradation, anaerobic, toluene => benzoyl-CoA	Ribosome, eukaryotes
DcuS-DcuR (C4-dicarboxylate metabolism) two-component regulatory system	DNA polymerase alpha / primase complex	DesK-DesR (membrane lipid fluidity regulation) two-component regulatory system	V/A-type ATPase, prokaryotes	RNA polymerase, archaea
Decapping complex	DNA polymerase epsilon complex	DNA polymerase alpha / primase complex	Vitamin B12 transport system	RPA complex
Denitrification, nitrate => nitrogen	DNA-PK complex	DNA polymerase epsilon complex		Sec61 complex
DesK-DesR (membrane lipid fluidity regulation) two-component regulatory system	ECV complex	DNA polymerase III complex, bacteria		Toluene degradation, anaerobic, toluene => benzoyl-CoA
Dissimilatory nitrate reduction, nitrate => ammonia	ESCRT-I complex	ECV complex		V/A-type ATPase, prokaryotes
DNA polymerase alpha / primase complex	ESCRT-III complex	EnvZ-OmpR (osmotic stress response) two-component regulatory system		Vitamin B12 transport system
DNA polymerase epsilon complex	Exosome, archaea	ESCRT-I complex		YdfH-YdfI two-component regulatory system
DNA-PK complex	Exosome, eukaryotes	ESCRT-III complex
ECV complex	F-type ATPase, eukaryotes	Exosome, archaea
ESCRT-I complex	F420 biosynthesis	Exosome, eukaryotes
ESCRT-III complex	FA core complex	F-type ATPase, eukaryotes
Exosome, archaea	Fatty acid biosynthesis, elongation, endoplasmic reticulum	F-type ATPase, prokaryotes and chloroplasts
Exosome, eukaryotes	Fructose transport system	F420 biosynthesis
F-type ATPase, eukaryotes	GINS complex	FA core complex
F420 biosynthesis	GlrK-GlrR (amino sugar metabolism) two-component regulatory system	Fatty acid biosynthesis, elongation, endoplasmic reticulum
FA core complex	Glucosinolate biosynthesis, tryptophan => glucobrassicin	Fatty acid biosynthesis, initiation
Fatty acid biosynthesis, elongation, endoplasmic reticulum	Glucuronate pathway (uronate pathway)	Fructose transport system
Fructose transport system	Glutathione biosynthesis, glutamate => glutathione	General L-amino acid transport system
GINS complex	H/ACA ribonucleoprotein complex	GlrK-GlrR (amino sugar metabolism) two-component regulatory system
GlrK-GlrR (amino sugar metabolism) two-component regulatory system	HRD1/SEL1 ERAD complex	Glucosinolate biosynthesis, tryptophan => glucobrassicin
Glucosinolate biosynthesis, tryptophan => glucobrassicin	HydH-HydG (metal tolerance) two-component regulatory system	Glucuronate pathway (uronate pathway)
Glucuronate pathway (uronate pathway)	Immunoproteasome	Glutathione biosynthesis, glutamate => glutathione
Glutathione biosynthesis, glutamate => glutathione	Inositol phosphate metabolism, Ins(1,3,4)P3 => phytate	Guanine ribonucleotide biosynthesis IMP => GDP,GTP
H/ACA ribonucleoprotein complex	Inositol phosphate metabolism, PI=> PIP2 => Ins(1,4,5)P3 => Ins(1,3,4,5)P4	H/ACA ribonucleoprotein complex
HRD1/SEL1 ERAD complex	L-Arabinose/lactose transport system	HRD1/SEL1 ERAD complex
HydH-HydG (metal tolerance) two-component regulatory system	LiaS-LiaR (cell wall stress response) two-component regulatory system	HydH-HydG (metal tolerance) two-component regulatory system
Immunoproteasome	Lipooligosaccharide transport system	Immunoproteasome
Inositol phosphate metabolism, Ins(1,3,4)P3 => phytate	Lsm 1-7 complex	Iron(III) transport system
Inositol phosphate metabolism, PI=> PIP2 => Ins(1,4,5)P3 => Ins(1,3,4,5)P4	Lsm 2-8 complex	L-Arabinose/lactose transport system
Jasmonic acid biosynthesis	Lysine biosynthesis, 2-oxoglutarate => 2-oxoadipate	LiaS-LiaR (cell wall stress response) two-component regulatory system
L-Arabinose/lactose transport system	Lysine biosynthesis, mediated by LysW, 2-aminoadipate => lysine	Lipopolysaccharide export system
LiaS-LiaR (cell wall stress response) two-component regulatory system	Manganese/iron transport system	Lsm 1-7 complex
Lipooligosaccharide transport system	Manganese/iron transport system	Lsm 2-8 complex
Lipopolysaccharide transport system	MCM complex	Lysine biosynthesis, 2-oxoglutarate => 2-oxoadipate
Lsm 1-7 complex	Melatonin biosynthesis, tryptophan => serotonin => melatonin	Lysine biosynthesis, mediated by LysW, 2-aminoadipate => lysine
Lsm 2-8 complex	Methanogenesis, methanol => methane	Manganese/iron transport system
Lysine biosynthesis, 2-oxoglutarate => 2-oxoadipate	MRN complex	Manganese/iron transport system
Lysine biosynthesis, mediated by LysW, 2-aminoadipate => lysine	MRX complex	MCM complex
Manganese/iron transport system	N-glycan biosynthesis, high-mannose type	Methanogenesis, methanol => methane
Manganese/iron transport system	N-glycan precursor biosynthesis	N-glycan precursor biosynthesis
MCM complex	N-glycan precursor trimming	N-glycan precursor trimming
Melatonin biosynthesis, tryptophan => serotonin => melatonin	N-glycosylation by oligosaccharyltransferase	N-glycosylation by oligosaccharyltransferase
Methanogenesis, acetate => methane	NA	NA
Methanogenesis, methanol => methane	NA	NA
MRN complex	NA	NA
MRX complex	NAD(P)H:quinone oxidoreductase, chloroplasts and cyanobacteria	NA
N-glycan biosynthesis, high-mannose type	NADH dehydrogenase (ubiquinone) 1 beta subcomplex	NAD(P)H:quinone oxidoreductase, chloroplasts and cyanobacteria
N-glycan precursor biosynthesis	NADH dehydrogenase (ubiquinone) Fe-S protein/flavoprotein complex, mitochondria	NblS-NblR (photosynthesis) two-component regulatory system
N-glycan precursor trimming	NADH:ubiquinone oxidoreductase, mitochondria	Nickel transport system
N-glycosylation by oligosaccharyltransferase	NblS-NblR (photosynthesis) two-component regulatory system	Nitrification, ammonia => nitrite
NA	Nickel transport system	NtrY-NtrX (nitrogen regulation) two-component regulatory system
NA	Nitrification, ammonia => nitrite	Nuclear pore complex
NA	Nuclear pore complex	O-glycan biosynthesis, mucin type core
NAD biosynthesis, aspartate => NAD	O-glycan biosynthesis, mucin type core	Octopine/nopaline transport system
NAD(P)H:quinone oxidoreductase, chloroplasts and cyanobacteria	Origin recognition complex	Origin recognition complex
NADH dehydrogenase (ubiquinone) 1 beta subcomplex	Osmoprotectant transport system	Osmoprotectant transport system
NADH dehydrogenase (ubiquinone) Fe-S protein/flavoprotein complex, mitochondria	p97-Ufd1-Npl4 complex	p97-Ufd1-Npl4 complex
NblS-NblR (photosynthesis) two-component regulatory system	Phosphate transport system	Pentose phosphate pathway, oxidative phase, glucose 6P => ribulose 5P
Nickel transport system	Phospholipid transport system	Phenylalanine biosynthesis, chorismate => phenylalanine
Nitrification, ammonia => nitrite	Photosystem I	Phosphate transport system
Nuclear pore complex	Photosystem II	Phospholipid transport system
O-glycan biosynthesis, mucin type core	Proteasome, 19S regulatory particle (PA700)	Photosystem I
Origin recognition complex	Proteasome, 20S core particle	Photosystem II
Osmoprotectant transport system	PrrB-PrrA (intracellular multiplication) two-component regulatory system	Polyamine biosynthesis, arginine => ornithine => putrescine
p97-Ufd1-Npl4 complex	PTS system, beta-glucoside-specific II component	Proline biosynthesis, glutamate => proline
Peptides/nickel transport system	PTS system, glucitol/sorbitol-specific II component	Proteasome, 19S regulatory particle (PA700)
Phenylalanine biosynthesis, chorismate => phenylalanine	PTS system, mannitol-specific II component	Proteasome, 20S core particle
Phosphate transport system	Putative ABC transport system	PrrB-PrrA (intracellular multiplication) two-component regulatory system
Phospholipid transport system	Putative zinc/manganese transport system	PTS system, beta-glucoside-specific II component
Photosystem I	Rhamnose transport system	PTS system, glucitol/sorbitol-specific II component
Photosystem II	Ribosome, eukaryotes	PTS system, mannitol-specific II component
Proteasome, 19S regulatory particle (PA700)	RNA polymerase, archaea	Putative ABC transport system
Proteasome, 20S core particle	RPA complex	Putative sn-glycerol-phosphate transport system
PrrB-PrrA (intracellular multiplication) two-component regulatory system	RTX toxin transport system	Putative zinc/manganese transport system
PTS system, beta-glucoside-specific II component	SasA-RpaAB (circadian timing mediating) two-component regulatory system	Pyridoxal biosynthesis, erythrose-4P => pyridoxal-5P
PTS system, glucitol/sorbitol-specific II component	SCF-BTRC complex	Pyrimidine deoxyribonuleotide biosynthesis, CDP/CTP => dCDP/dCTP,dTDP/dTTP
PTS system, mannitol-specific II component	SCF-CDC4 complex	RegB-RegA (redox response) two-component regulatory system
PTS system, sorbose-specific II component	SCF-FBS complex	Rhamnose transport system
Putative ABC transport system	SCF-FBW7 complex	Riboflavin biosynthesis, GTP => riboflavin/FMN/FAD
Putative zinc/manganese transport system	SCF-GRR1 complex	Ribosome, eukaryotes
Pyrimidine deoxyribonuleotide biosynthesis, CDP/CTP => dCDP/dCTP,dTDP/dTTP	SCF-MET30 complex	RNA degradosome
Rhamnose transport system	SCF-SKP2 complex	RNA polymerase, archaea
Riboflavin biosynthesis, GTP => riboflavin/FMN/FAD	Sec61 complex	RNA polymerase, bacteria
Ribosome, eukaryotes	Ski complex	RPA complex
RNA polymerase, archaea	Sm core complex	RTX toxin transport system
RPA complex	Sphingosine degradation	SasA-RpaAB (circadian timing mediating) two-component regulatory system
RTX toxin transport system	Spliceosome, 35S U5-snRNP	SCF-BTRC complex
SasA-RpaAB (circadian timing mediating) two-component regulatory system	Spliceosome, U1-snRNP	SCF-CDC4 complex
SCF-BTRC complex	Spliceosome, U2-snRNP	SCF-FBS complex
SCF-CDC4 complex	Spliceosome, U4/U6.U5 tri-snRNP	SCF-FBW7 complex
SCF-FBS complex	Survival motor neuron (SMN) complex	SCF-GRR1 complex
SCF-FBW7 complex	THC complex	SCF-MET30 complex
SCF-GRR1 complex	Toluene degradation, anaerobic, toluene => benzoyl-CoA	SCF-SKP2 complex
SCF-MET30 complex	Trehalose/maltose transport system	Sec61 complex
SCF-SKP2 complex	TREX complex	Sm core complex
Sec61 complex	Tyrosine biosynthesis, prephanate => pretyrosine => tyrosine	Spliceosome, 35S U5-snRNP
Ski complex	Ubiquinone biosynthesis, eukaryotes, 4-hydroxybenzoate => ubiquinone	Spliceosome, U1-snRNP
Sm core complex	Urea transport system	Spliceosome, U2-snRNP
Spermidine/putrescine transport system	V-type ATPase, eukaryotes	Spliceosome, U4/U6.U5 tri-snRNP
Sphingosine degradation	V/A-type ATPase, prokaryotes	THC complex
Spliceosome, 35S U5-snRNP	Vitamin B12 transport system	Toluene degradation, anaerobic, toluene => benzoyl-CoA
Spliceosome, U1-snRNP	YdfH-YdfI two-component regulatory system	Trehalose/maltose transport system
Spliceosome, U2-snRNP		TREX complex
Spliceosome, U4/U6.U5 tri-snRNP		Tyrosine biosynthesis, prephanate => pretyrosine => tyrosine
Survival motor neuron (SMN) complex		Ubiquinone biosynthesis, eukaryotes, 4-hydroxybenzoate => ubiquinone
THC complex		Urea transport system
Toluene degradation, anaerobic, toluene => benzoyl-CoA		V-type ATPase, eukaryotes
Trehalose/maltose transport system		V/A-type ATPase, prokaryotes
TREX complex		Vitamin B12 transport system
Tyrosine biosynthesis, prephanate => pretyrosine => tyrosine		YdfH-YdfI two-component regulatory system
Ubiquinone biosynthesis, eukaryotes, 4-hydroxybenzoate => ubiquinone		Zinc transport system
Urea transport system
V-type ATPase, eukaryotes
V/A-type ATPase, prokaryotes
Vitamin B12 transport system
YdfH-YdfI two-component regulatory system

## Sheet: FAPRO.POS.SIG.DCM
totsum	tmm	css	scran	wrench.wmmean
acetoclastic_methanogenesis	acetoclastic_methanogenesis	aerobic_ammonia_oxidation	aerobic_ammonia_oxidation	aerobic_ammonia_oxidation
aerobic_ammonia_oxidation	aerobic_ammonia_oxidation	aerobic_chemoheterotrophy	aerobic_chemoheterotrophy	aerobic_anoxygenic_phototrophy
aerobic_anoxygenic_phototrophy	aerobic_chemoheterotrophy	aerobic_nitrite_oxidation	aerobic_nitrite_oxidation	aerobic_chemoheterotrophy
aerobic_chemoheterotrophy	aerobic_nitrite_oxidation	aliphatic_non_methane_hydrocarbon_degradation	aliphatic_non_methane_hydrocarbon_degradation	aerobic_nitrite_oxidation
aerobic_nitrite_oxidation	aliphatic_non_methane_hydrocarbon_degradation	animal_parasites_or_symbionts	animal_parasites_or_symbionts	aliphatic_non_methane_hydrocarbon_degradation
aliphatic_non_methane_hydrocarbon_degradation	animal_parasites_or_symbionts	chitinolysis	chitinolysis	animal_parasites_or_symbionts
animal_parasites_or_symbionts	chemoheterotrophy	dark_thiosulfate_oxidation	dark_thiosulfate_oxidation	cellulolysis
chemoheterotrophy	chitinolysis	fermentation	fermentation	chitinolysis
chitinolysis	dark_sulfite_oxidation	fish_parasites	fish_parasites	dark_thiosulfate_oxidation
dark_sulfite_oxidation	dark_thiosulfate_oxidation	fumarate_respiration	human_gut	fermentation
dark_thiosulfate_oxidation	fermentation	human_gut	human_pathogens_all	fish_parasites
fermentation	fish_parasites	human_pathogens_all	human_pathogens_diarrhea	human_gut
fish_parasites	fumarate_respiration	human_pathogens_diarrhea	human_pathogens_gastroenteritis	human_pathogens_all
fumarate_respiration	human_gut	human_pathogens_gastroenteritis	human_pathogens_meningitis	human_pathogens_diarrhea
human_gut	human_pathogens_all	human_pathogens_meningitis	human_pathogens_nosocomia	human_pathogens_gastroenteritis
human_pathogens_all	human_pathogens_diarrhea	human_pathogens_nosocomia	human_pathogens_pneumonia	human_pathogens_meningitis
human_pathogens_diarrhea	human_pathogens_gastroenteritis	human_pathogens_pneumonia	human_pathogens_septicemia	human_pathogens_nosocomia
human_pathogens_gastroenteritis	human_pathogens_meningitis	human_pathogens_septicemia	invertebrate_parasites	human_pathogens_pneumonia
human_pathogens_meningitis	human_pathogens_nosocomia	invertebrate_parasites	nitrogen_fixation	human_pathogens_septicemia
human_pathogens_nosocomia	human_pathogens_pneumonia	nitrate_reduction	photoheterotrophy	hydrocarbon_degradation
human_pathogens_pneumonia	human_pathogens_septicemia	nitrate_respiration	plant_pathogen	invertebrate_parasites
human_pathogens_septicemia	invertebrate_parasites	nitrogen_fixation	plastic_degradation	nitrite_respiration
invertebrate_parasites	methanogenesis_by_disproportionation_of_methyl_groups	oil_bioremediation		nitrogen_fixation
methanogenesis_by_disproportionation_of_methyl_groups	nitrogen_fixation	photoheterotrophy		photoheterotrophy
methanogenesis_using_formate	oil_bioremediation	plant_pathogen		plant_pathogen
nitrogen_fixation	photoheterotrophy	plastic_degradation		plastic_degradation
oil_bioremediation	plant_pathogen
photoheterotrophy	plastic_degradation
plant_pathogen
plastic_degradation
